# Supplementary material for: Theoretical insights on the excited-state-deactivation mechanisms of protonated thymine and cytosine
Source: Royal Society of Chemistry journal article supplement (doi:10.1039/d0cp06673g), 2021-01-01
Supplement: d0cp06673g1.pdf [file d0cp06673g1.pdf]

## Electronic Supplementary File

### Theoretical insights on the excited state deactivation mechanisms of protonated Thymine and Cytosine

Leila Shahrokh, Reza Omidyan and Gholamhassan Azimi

Department of Chemistry, University of Isfahan, 81746-73441, Isfahan, Iran

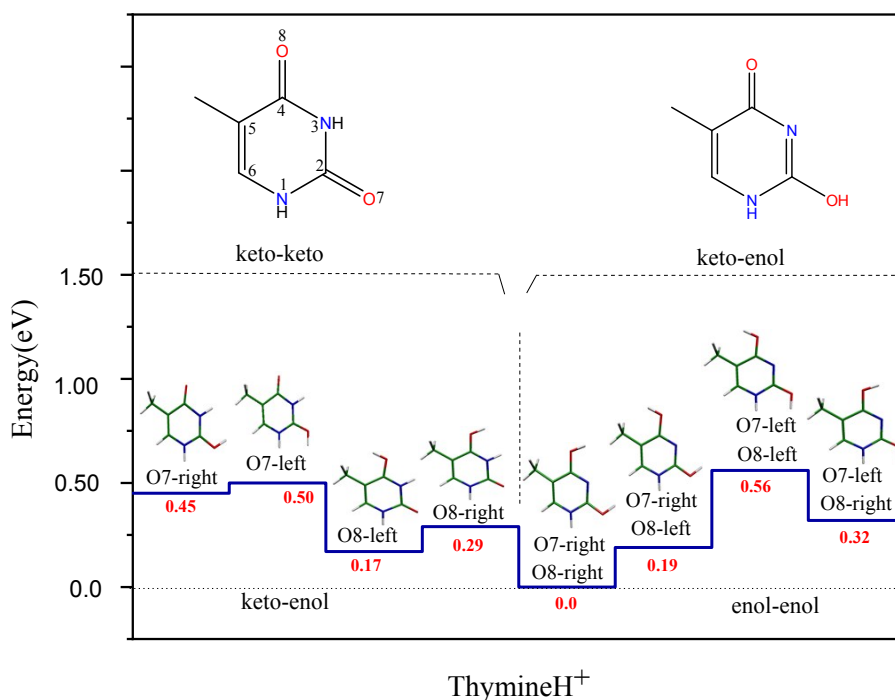

**Figure S1.** Relative stability for selected protonated isomers of Thymine determined at the MP2/aug-cc-pVDZ level.

**Table S1:** The xyz coordinates of the ground state optimized geometry of the most stable isomer of TH<sup>+</sup>. The energetic values (in eV) represent the relative stabilities at the MP2/aug-cc-pVDZ level of theory.

| TH <sup>+</sup> - minima S <sub>0</sub> (0.0 eV) |          |          |          |                                                                                   |
|--------------------------------------------------|----------|----------|----------|-----------------------------------------------------------------------------------|
|                                                  |          |          |          | 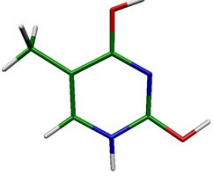 |
| C                                                | -6.38400 | 3.33200  | 0.01500  |                                                                                   |
| C                                                | -5.11100 | 2.67900  | 0.00500  |                                                                                   |
| C                                                | -5.16800 | 1.29900  | 0.00100  |                                                                                   |
| C                                                | -7.53600 | 1.36600  | 0.01600  |                                                                                   |
| C                                                | -3.82700 | 3.46200  | 0.00000  |                                                                                   |
| N                                                | -6.38400 | 0.65900  | 0.00600  |                                                                                   |
| N                                                | -7.56500 | 2.69200  | 0.02000  |                                                                                   |
| O                                                | -8.63900 | 0.63000  | 0.02000  |                                                                                   |
| O                                                | -6.37900 | 4.65700  | 0.01900  |                                                                                   |
| H                                                | -6.44200 | -0.36000 | 0.00400  |                                                                                   |
| H                                                | -2.96100 | 2.78800  | -0.00600 |                                                                                   |
| H                                                | -3.77600 | 4.10700  | 0.89000  |                                                                                   |
| H                                                | -3.78500 | 4.11100  | -0.88800 |                                                                                   |
| H                                                | -4.28400 | 0.65900  | -0.00600 |                                                                                   |
| H                                                | -7.30000 | 4.98400  | 0.02500  |                                                                                   |
| H                                                | -9.41600 | 1.22100  | 0.02700  |                                                                                   |

**Table S2:** Schemes of valence molecular orbitals of  $TH^+$  involved four occupied and four virtual orbitals in CASSCF (8,8) geometry optimization of conical intersections and six occupied and four virtual orbitals in the PEs curve at the CASPT2 (12, 10) level.

|        | <i>HOMO</i> ( $\pi$ )                                                             | <i>HOMO-1</i> ( $\pi$ )                                                           | <i>HOMO-2</i> ( $n$ )                                                             | <i>HOMO-3</i> ( $n$ )                                                              | <i>HOMO-4</i> ( $\pi$ )                                                             |
|--------|-----------------------------------------------------------------------------------|-----------------------------------------------------------------------------------|-----------------------------------------------------------------------------------|------------------------------------------------------------------------------------|-------------------------------------------------------------------------------------|
| $TH^+$ | 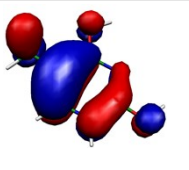 |  |  |  |  |
|        | <i>LUMO</i> ( $\pi^*$ )                                                           | <i>LUMO+1</i> ( $\sigma^*$ )                                                      | <i>LUMO+2</i> ( $\sigma^*$ )                                                      | <i>LUMO+3</i> ( $\sigma^*$ )                                                       | <i>HOMO-5</i> ( $\pi$ )                                                             |
|        |  |  |  |  |  |

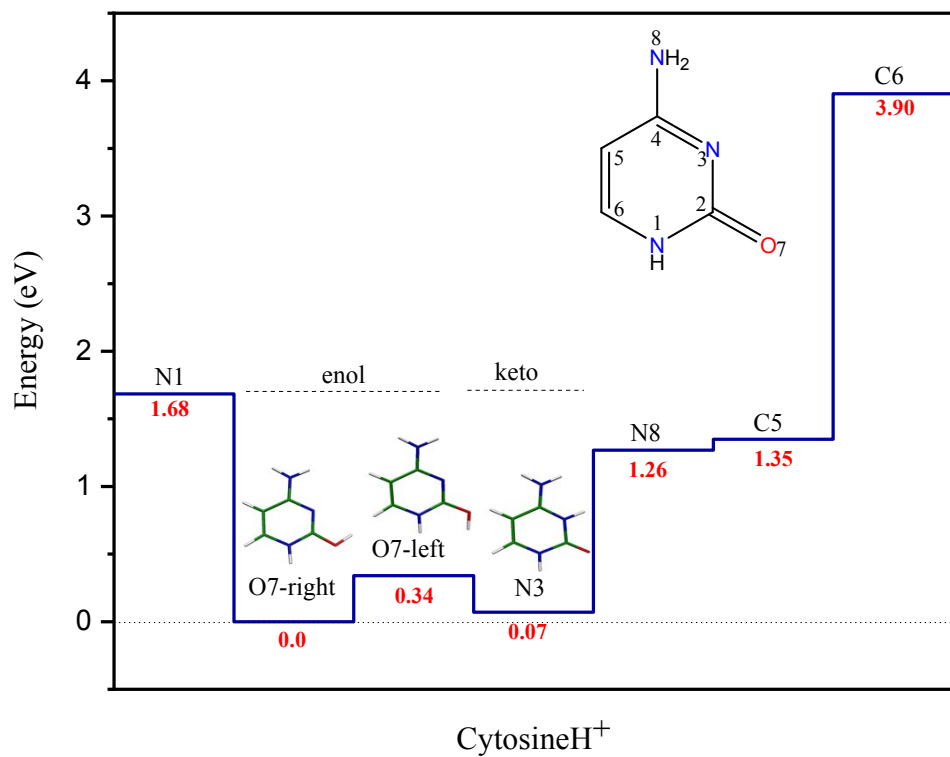

**Figure S2.** Relative stability for selected protonated isomers of Cytosine determined at the MP2/aug-cc-pVDZ level

**Table S3:** The xyz coordinates of the ground state optimized geometry of the most stable isomer of  $CH^+$  ( $CHE^+$ ) and the second most stable isomer of  $CH^+$  ( $CHK^+$ ). The energetic values (in eV) represent the relative stabilities at the MP2/aug-cc-pVDZ level of theory.

| <b><math>CHE^+</math>- minima <math>S_0</math> (0.0 eV)</b>                         |          |          |          |
|-------------------------------------------------------------------------------------|----------|----------|----------|
| 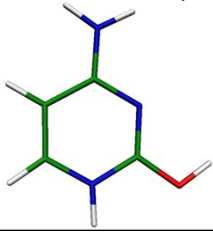   |          |          |          |
| C                                                                                   | -1.27700 | -0.82800 | 0.00300  |
| N                                                                                   | -1.34400 | 0.53100  | 0.00900  |
| C                                                                                   | -0.01800 | -1.51900 | -0.00300 |
| C                                                                                   | 1.12200  | -0.75600 | -0.00100 |
| C                                                                                   | -0.20800 | 1.19900  | 0.01000  |
| N                                                                                   | 1.01800  | 0.61300  | 0.00500  |
| N                                                                                   | -2.44200 | -1.48200 | 0.00200  |
| O                                                                                   | -0.16800 | 2.52600  | 0.01600  |
| H                                                                                   | 0.04400  | -2.60800 | -0.00800 |
| H                                                                                   | 2.13000  | -1.17100 | -0.00500 |
| H                                                                                   | 1.84500  | 1.21000  | 0.00700  |
| H                                                                                   | -3.30800 | -0.95300 | 0.00600  |
| H                                                                                   | -2.48400 | -2.49500 | -0.00300 |
| H                                                                                   | -1.08300 | 2.86500  | 0.02000  |
| <b><math>CHK^+</math>- minima <math>S_0</math> (0.07 eV)</b>                        |          |          |          |
|  |          |          |          |
| C                                                                                   | -1.29800 | -0.85900 | 0.00200  |
| N                                                                                   | -1.30000 | 0.50000  | 0.00800  |
| C                                                                                   | -0.03800 | -1.52600 | -0.00300 |
| C                                                                                   | 1.09800  | -0.75100 | -0.00100 |
| C                                                                                   | -0.15700 | 1.33800  | 0.01000  |
| N                                                                                   | 1.03500  | 0.61000  | 0.00500  |
| N                                                                                   | -2.46100 | -1.51500 | 0.00100  |
| O                                                                                   | -0.23700 | 2.54800  | 0.01500  |
| H                                                                                   | 0.02300  | -2.61300 | -0.00700 |
| H                                                                                   | 2.09800  | -1.18800 | -0.00400 |
| H                                                                                   | 1.88500  | 1.17300  | 0.00600  |
| H                                                                                   | -3.35600 | -1.03700 | 0.00400  |
| H                                                                                   | -2.47100 | -2.52900 | -0.00300 |
| H                                                                                   | -2.17700 | 1.02400  | 0.01100  |

**Table S4:** The xyz coordinates of the CASSCF (8,8)/cc-pVDZ optimized geometry of the  $S_1/S_0$  conical intersections ( $CI_{1-3}$ ) resulting from out-of-plane deformation of  $TH^+$ .

| <b><math>TH^+</math>- <math>C_6</math> out-of-plane: <math>CI_1</math></b> |                                                                                     |          |          |  |
|----------------------------------------------------------------------------|-------------------------------------------------------------------------------------|----------|----------|--|
|                                                                            | 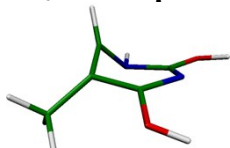   |          |          |  |
| C                                                                          | -6.44700                                                                            | 3.53000  | 0.34300  |  |
| C                                                                          | -5.23700                                                                            | 2.89300  | 0.61400  |  |
| C                                                                          | -5.44400                                                                            | 1.48200  | 0.95300  |  |
| C                                                                          | -7.36700                                                                            | 1.49200  | -0.06400 |  |
| C                                                                          | -3.96300                                                                            | 3.28900  | -0.11000 |  |
| N                                                                          | -6.07500                                                                            | 0.86500  | -0.07800 |  |
| N                                                                          | -7.58000                                                                            | 2.74400  | 0.16600  |  |
| O                                                                          | -8.30800                                                                            | 0.63100  | -0.24300 |  |
| O                                                                          | -6.51600                                                                            | 4.78900  | 0.02200  |  |
| H                                                                          | -6.14600                                                                            | -0.14100 | -0.07900 |  |
| H                                                                          | -3.62300                                                                            | 2.48000  | -0.75800 |  |
| H                                                                          | -3.17900                                                                            | 3.48700  | 0.62100  |  |
| H                                                                          | -4.12600                                                                            | 4.18300  | -0.70700 |  |
| H                                                                          | -5.39400                                                                            | 1.04000  | 1.94500  |  |
| H                                                                          | -7.35100                                                                            | 5.00300  | -0.38200 |  |
| H                                                                          | -9.17100                                                                            | 1.03500  | -0.16700 |  |
| <b><math>TH^+</math>- <math>C_4</math> out-of-plane: <math>CI_2</math></b> |                                                                                     |          |          |  |
|                                                                            |  |          |          |  |
| C                                                                          | -6.34000                                                                            | 3.27900  | 0.78000  |  |
| C                                                                          | -5.05500                                                                            | 2.69600  | 0.37300  |  |
| C                                                                          | -5.14000                                                                            | 1.28000  | 0.47600  |  |
| C                                                                          | -7.47600                                                                            | 1.57700  | -0.01000 |  |
| C                                                                          | -3.92800                                                                            | 3.42700  | -0.27300 |  |
| N                                                                          | -6.35300                                                                            | 0.77700  | 0.39100  |  |
| N                                                                          | -7.43900                                                                            | 2.86400  | -0.03300 |  |
| O                                                                          | -8.43200                                                                            | 0.79800  | -0.45200 |  |
| O                                                                          | -6.49900                                                                            | 3.09700  | 2.10200  |  |
| H                                                                          | -6.48400                                                                            | -0.22300 | 0.34500  |  |
| H                                                                          | -3.18100                                                                            | 2.75100  | -0.68500 |  |
| H                                                                          | -3.44900                                                                            | 4.07500  | 0.46500  |  |
| H                                                                          | -4.31400                                                                            | 4.07100  | -1.06700 |  |
| H                                                                          | -4.30900                                                                            | 0.58900  | 0.41600  |  |
| H                                                                          | -7.37500                                                                            | 3.33700  | 2.38400  |  |
| H                                                                          | -9.17300                                                                            | 1.31200  | -0.76000 |  |

**TH<sup>+</sup>- C<sub>2</sub> out-of-plane: Cl<sub>3</sub>**

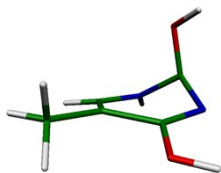

|   |          |          |          |
|---|----------|----------|----------|
| C | -6.50400 | 3.29900  | -0.02700 |
| C | -5.17400 | 2.63600  | 0.14100  |
| C | -5.17800 | 1.22300  | -0.01800 |
| C | -7.36700 | 1.40500  | 0.62200  |
| C | -3.91900 | 3.43900  | 0.25100  |
| N | -6.36500 | 0.66300  | -0.07700 |
| N | -7.64200 | 2.65600  | 0.03500  |
| O | -7.19200 | 1.33500  | 1.93300  |
| O | -6.43200 | 4.56600  | -0.35500 |
| H | -6.56300 | -0.19300 | -0.56800 |
| H | -3.04000 | 2.79700  | 0.25700  |
| H | -3.93300 | 4.02300  | 1.17300  |
| H | -3.84800 | 4.14300  | -0.57800 |
| H | -4.27700 | 0.64500  | -0.17800 |
| H | -7.30200 | 4.92500  | -0.50800 |
| H | -7.65100 | 2.03900  | 2.38000  |

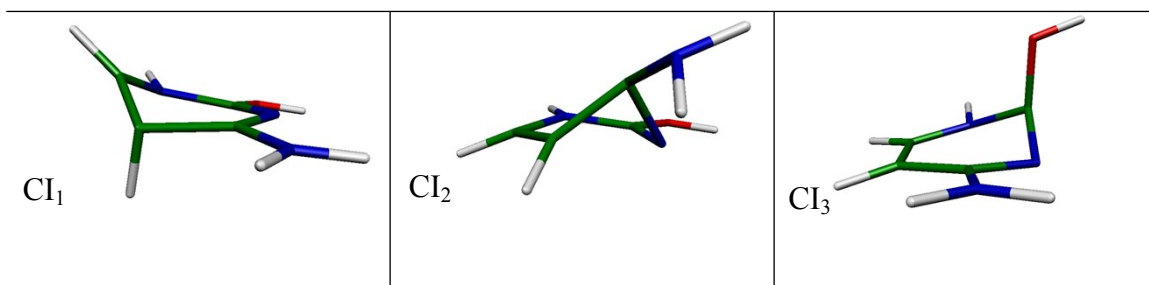

**Figure S3.** *Optimized geometries of the conical intersections located for CHE<sup>+</sup> determined at CASSCF (8,8)/cc-pVDZ level.*



**Table S5:** Schemes of valence molecular orbitals of  $\text{CHE}^+$  and  $\text{CHK}^+$  involved four occupied and four virtual orbitals in CASSCF (8,8) geometry optimization of conical intersections and six occupied and four virtual orbitals in the PE<sub>s</sub> curve at the CASPT2 (12, 10) level.

|                |                  |                       |                       |                       |                  |
|----------------|------------------|-----------------------|-----------------------|-----------------------|------------------|
| $\text{CHE}^+$ | HOMO ( $\pi$ )   | HOMO-1 ( $\pi$ )      | HOMO-2 (n)            | HOMO-3 ( $\pi$ )      | HOMO-4 ( $\pi$ ) |
|                |                  |                       |                       |                       |                  |
|                | LUMO ( $\pi^*$ ) | LUMO+1 ( $\sigma^*$ ) | LUMO+2 ( $\sigma^*$ ) | LUMO+3 ( $\sigma^*$ ) | HOMO-5 (n)       |
|                |                  |                       |                       |                       |                  |

|                |                  |                       |                       |                       |                  |
|----------------|------------------|-----------------------|-----------------------|-----------------------|------------------|
| $\text{CHK}^+$ | HOMO ( $\pi$ )   | HOMO-1 ( $\pi$ )      | HOMO-2 (n)            | HOMO-3 ( $\pi$ )      | HOMO-4 ( $\pi$ ) |
|                |                  |                       |                       |                       |                  |
|                | LUMO ( $\pi^*$ ) | LUMO+1 ( $\sigma^*$ ) | LUMO+2 ( $\sigma^*$ ) | LUMO+3 ( $\sigma^*$ ) | HOMO-5 (n)       |
|                |                  |                       |                       |                       |                  |

**Table S6:** The xyz coordinates of the CASSCF (8,8)/cc-pVDZ optimized geometry of the  $S_1/S_0$  conical intersections ( $CI_{1,3}$ ) and ( $CI_{1,2}$ ) resulting from out-of-plane deformation of  $CHE^+$  and  $CHK^+$  respectively.

| <b>CHE<sup>+</sup> - C<sub>6</sub> out-of-plane: CI<sub>1</sub></b> |          |          |          |
|---------------------------------------------------------------------|----------|----------|----------|
| C                                                                   | -1.08000 | -0.78400 | 0.76600  |
| N                                                                   | -1.14300 | 0.57900  | 0.53100  |
| C                                                                   | 0.21900  | -1.45000 | 0.73100  |
| C                                                                   | 1.09900  | -0.80100 | -0.22500 |
| C                                                                   | -0.03600 | 1.16500  | 0.25400  |
| N                                                                   | 1.17000  | 0.52600  | -0.07500 |
| N                                                                   | -2.17300 | -1.34800 | 1.15600  |
| O                                                                   | 0.07500  | 2.45300  | 0.13600  |
| H                                                                   | 0.62200  | -1.20600 | 1.72800  |
| H                                                                   | 1.66400  | -1.27100 | -1.02100 |
| H                                                                   | 1.85300  | 1.10000  | -0.54500 |
| H                                                                   | -3.00200 | -0.80100 | 1.31200  |
| H                                                                   | -2.18800 | -2.33600 | 1.33600  |
| H                                                                   | -0.75400 | 2.88500  | 0.32400  |
| <b>CHE<sup>+</sup> - C<sub>4</sub> out-of-plane: CI<sub>2</sub></b> |          |          |          |
| C                                                                   | -1.19100 | -0.97200 | -0.36300 |
| N                                                                   | -1.05500 | 0.21200  | 0.56000  |
| C                                                                   | 0.02000  | -1.40400 | 0.30900  |
| C                                                                   | 1.24700  | -0.75500 | 0.00000  |
| C                                                                   | -0.10800 | 1.06000  | 0.08100  |
| N                                                                   | 1.06200  | 0.58500  | -0.30100 |
| N                                                                   | -2.33300 | -1.72100 | -0.40700 |
| O                                                                   | -0.30300 | 2.33000  | 0.01700  |
| H                                                                   | 0.00200  | -2.20300 | 1.04100  |
| H                                                                   | 2.23800  | -1.11500 | 0.22000  |
| H                                                                   | 1.79300  | 1.19800  | -0.62000 |
| H                                                                   | -2.51600 | -2.30100 | 0.39400  |
| H                                                                   | -3.15100 | -1.21200 | -0.68300 |
| H                                                                   | -1.17800 | 2.57400  | 0.31200  |

**CHE<sup>+</sup>- C<sub>2</sub> out-of-plane:CI<sub>3</sub>**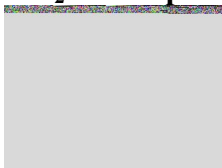

|   |          |          |          |
|---|----------|----------|----------|
| C | -1.27200 | -0.88000 | -0.04900 |
| N | -1.25300 | 0.47400  | -0.35300 |
| C | -0.00900 | -1.52600 | -0.03900 |
| C | 1.09700  | -0.71700 | -0.01900 |
| C | -0.21800 | 1.23000  | 0.32400  |
| N | 1.02700  | 0.63000  | -0.01300 |
| N | -2.42700 | -1.45500 | 0.09400  |
| O | -0.44900 | 1.36500  | 1.64200  |
| H | 0.07300  | -2.59900 | -0.08200 |
| H | 2.08800  | -1.14700 | -0.02800 |
| H | 1.85200  | 1.14900  | 0.21300  |
| H | -3.27500 | -0.92700 | 0.00800  |
| H | -2.49500 | -2.43900 | 0.26900  |
| H | -0.84400 | 2.20700  | 1.83900  |

**CHK<sup>+</sup>- C<sub>6</sub> out-of-plane: CI<sub>1</sub>**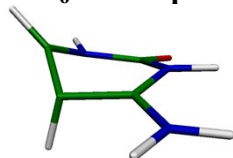

|   |          |          |          |
|---|----------|----------|----------|
| C | -1.27700 | -1.03300 | 0.16900  |
| N | -1.34000 | 0.30200  | 0.14800  |
| C | 0.07800  | -1.57000 | 0.23500  |
| C | 1.02100  | -0.64100 | 0.85300  |
| C | -0.20700 | 1.13900  | -0.08600 |
| N | 1.02100  | 0.57000  | 0.22700  |
| N | -2.34200 | -1.77200 | 0.03700  |
| O | -0.36000 | 2.26500  | -0.47100 |
| H | 0.37600  | -1.90500 | -0.76100 |
| H | 1.61100  | -0.80600 | 1.74200  |
| H | 1.77800  | 1.22900  | 0.30500  |
| H | -3.24900 | -1.38700 | -0.14900 |
| H | -2.26600 | -2.76700 | 0.13000  |
| H | -2.21500 | 0.78300  | 0.03400  |

**CHK<sup>+</sup>- C<sub>4</sub> out-of-plane: Cl<sub>2</sub>**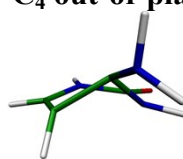

|   |          |          |          |
|---|----------|----------|----------|
| C | -1.20400 | -0.96700 | -0.19100 |
| N | -1.12100 | 0.17700  | 0.65100  |
| C | 0.17600  | -1.60700 | 0.18800  |
| C | 1.26900  | -0.74800 | -0.11100 |
| C | -0.17900 | 1.11200  | 0.29800  |
| N | 1.01600  | 0.51700  | -0.25900 |
| N | -2.35600 | -1.72300 | -0.17600 |
| O | -0.20900 | 2.29700  | 0.47200  |
| H | 0.25000  | -2.21800 | 1.08200  |
| H | 2.28400  | -1.10100 | -0.25800 |
| H | 1.73600  | 1.17300  | -0.51400 |
| H | -2.98500 | -1.57900 | 0.59200  |
| H | -2.84000 | -1.76900 | -1.05300 |
| H | -1.92200 | 0.53600  | 1.14100  |

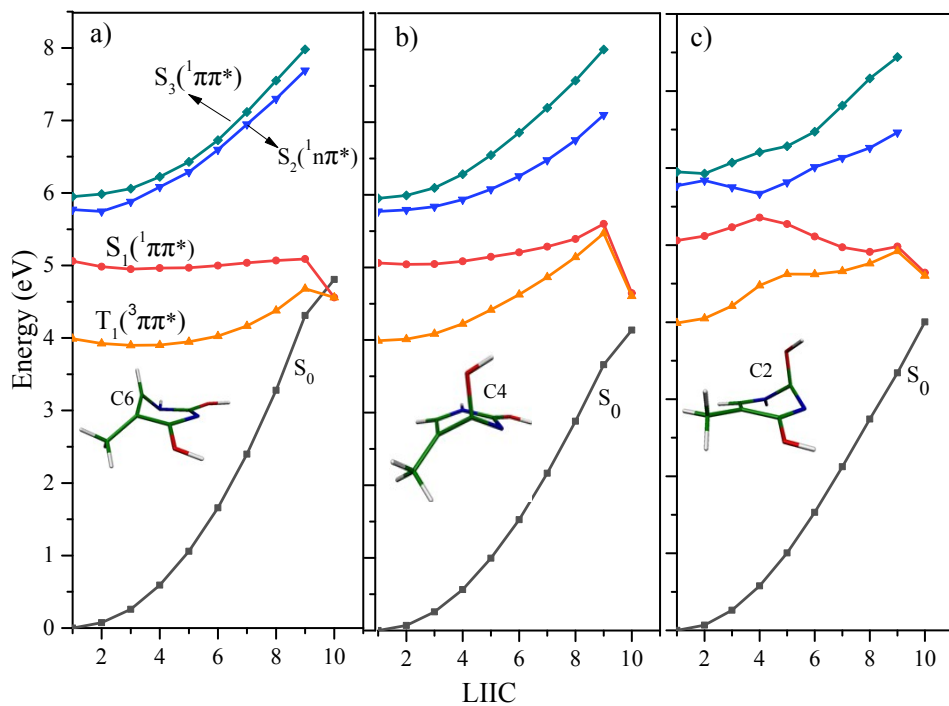

**Figure S4.** Potential energy curves along the LIIC reaction paths connecting the  ${}^1\pi\pi^*$  minima of  $TH^+$ . The curves were calculated at the ADC (2) /aug-cc-pVDZ level of theory for ground state, three singlet excited state and the first triplet excited state. The insets, exhibit the CASSCF (8,8)/aug-cc-pVDZ optimized geometries of three different conical intersections ( $CI_{1-3}$ ) arisen from out-of-plane deformation of  $TH^+$ .

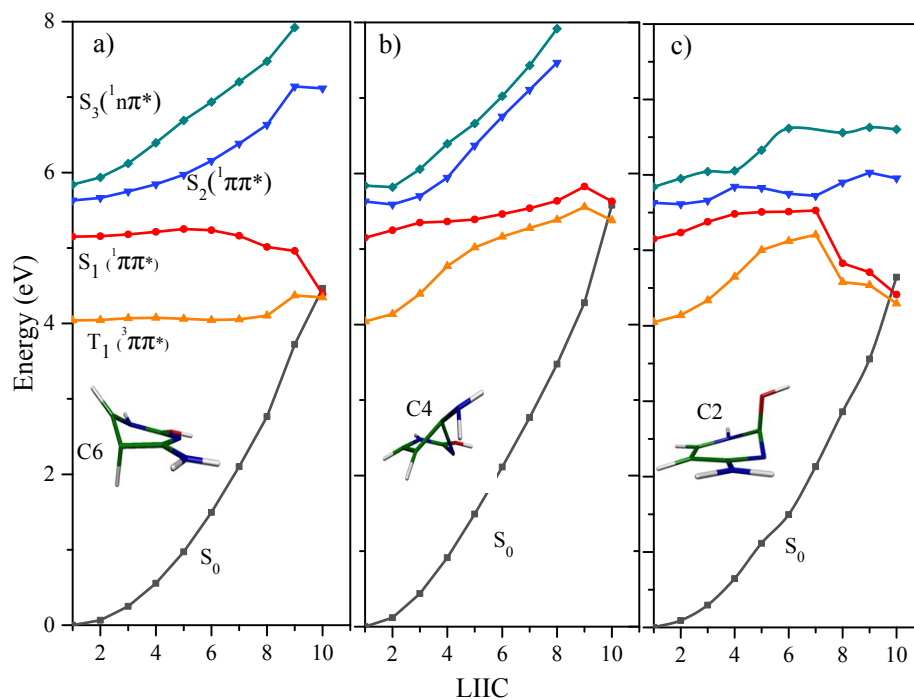

**Figure S5.** Potential energy curves along the LIIC reaction paths connecting the  ${}^1\pi\pi^*$  minima of  $\text{CHE}^+$ . The curves were calculated at the ADC (2) /aug-cc-pVDZ level of theory for ground state, three singlet excited state and the first triplet excited state. The insets, exhibit the CASSCF (8,8)/aug-cc-pVDZ optimized geometries of three different conical intersections ( $\text{CI}_{1-3}$ ) arisen from out-of-plane deformation of  $\text{CHE}^+$ .

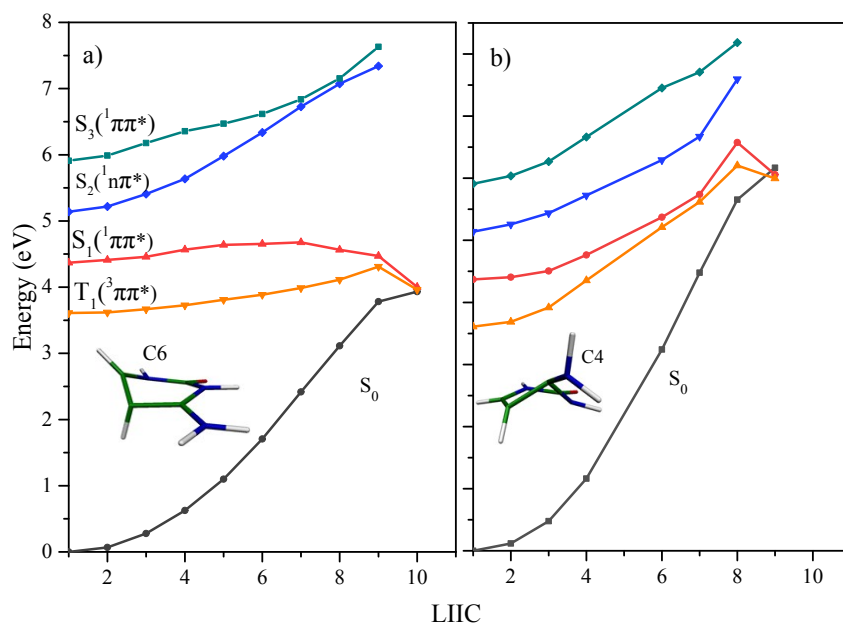

**Figure S6.** Potential energy curves along the LIIC reaction paths connecting the  $^1\pi\pi^*$  minima of  $\text{CHK}^+$ . The curves were calculated at the ADC (2) /aug-cc-pVDZ level of theory for ground state, three singlet excited state and the first triplet excited state. The insets, exhibit the CASSCF (8,8)/aug-cc-pVDZ optimized geometries of three different conical intersections ( $CI_{1,2}$ ) arisen from out-of-plane deformation of  $\text{CHK}^+$ .
